# Supplementary material
Source: Research Square preprint supplement (doi:10.21203/rs.3.rs-9743649/v1)
Supplement: Supplementary file 1 [file e68b396a7384c703bcfe6d8a.pdf]

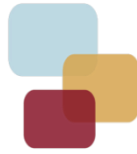

**BRIDGE GenAI Lab**

BIDMC–DFCI Radiology & Imaging Generative AI Hub  
Beth Israel Deaconess Medical Center · Harvard Medical School

---

**Supplementary Information**

Generative Large Language Models in the Clinical Management of Alzheimer's  
Disease and Mild Cognitive Impairment.

## Contents

|                                                                                                                                                                                   |    |
|-----------------------------------------------------------------------------------------------------------------------------------------------------------------------------------|----|
| Supplementary Figures.....                                                                                                                                                        | 3  |
| <b>Figure S1.</b> Risk-of-bias summary for included studies. (A) QUADAS-AI assessment of diagnostic studies (n = 3). (B) AXIS assessment of non-diagnostic studies (n = 8). ..... | 3  |
| Supplementary Tables.....                                                                                                                                                         | 4  |
| <b>Table S1.</b> Search strategies across databases. ....                                                                                                                         | 4  |
| <b>Table S2.</b> Risk-of-bias summary for all included studies (n = 11), including assessment tool, overall judgment, and primary methodological concern. ....                    | 6  |
| <b>Table S3.</b> QUADAS-AI signalling questions and risk-of-bias judgments for diagnostic studies (n = 3). .....                                                                  | 7  |
| <b>Table S4.</b> QUADAS-AI justification notes for diagnostic studies (n = 3). .....                                                                                              | 8  |
| <b>Table S5.</b> AXIS checklist responses for non-diagnostic studies (n = 8). .....                                                                                               | 11 |
| <b>Table S6.</b> AXIS justification notes for non-diagnostic studies (n = 8). .....                                                                                               | 13 |

Supplementary Figures

**Figure S1.** Risk-of-bias summary for included studies. (A) QUADAS-AI assessment of diagnostic studies (n = 3). (B) AXIS assessment of non-diagnostic studies (n = 8).

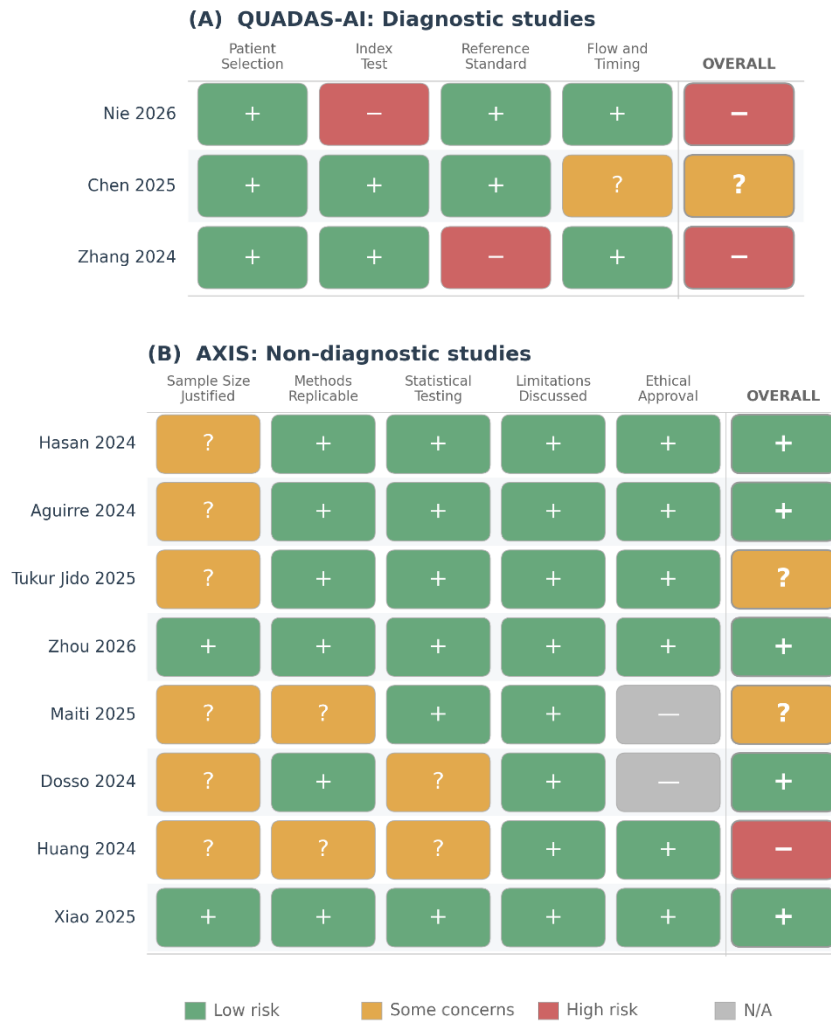

*Green circles indicate low risk of bias, yellow circles indicate some concerns, and red circles indicate high risk of bias.*

## Supplementary Tables

**Table S1.** Search strategies across databases.

### **PubMed**

(  
"large language model"[Title/Abstract] OR "large language models"[Title/Abstract] OR LLM[Title/Abstract] OR LLMs[Title/Abstract] OR "generative AI"[Title/Abstract] OR "generative artificial intelligence"[Title/Abstract] OR "ChatGPT"[Title/Abstract] OR "GPT"[Title/Abstract] OR "GPT-4"[Title/Abstract] OR "GPT-3.5"[Title/Abstract] OR "GPT-4o"[Title/Abstract] OR "LLaMA"[Title/Abstract] OR "DeepSeek"[Title/Abstract]

)

**AND**

(  
"Alzheimer"[Title/Abstract] OR "Alzheimer's disease"[Title/Abstract] OR "Alzheimer disease"[Title/Abstract] OR "mild cognitive impairment"[Title/Abstract] OR "MCI"[Title/Abstract] OR "cognitive decline"[Title/Abstract] OR "cognitive dysfunction"[Title/Abstract] OR "dementia"[Title/Abstract] OR "neurocognitive disorder"[Title/Abstract] OR "Alzheimer Disease"[MeSH] OR "Cognitive Dysfunction"[MeSH]

)

Filters: Language- English; Date: 2023/01/01 – Present

**PubMed Total: 279**

### **Scopus**

TITLE-ABS-KEY

((  
"large language model" OR "large language models" OR "LLM" OR "ChatGPT" OR "GPT-4" OR "GPT-3.5" OR "GPT-4o" OR "generative artificial intelligence" OR "generative AI" OR "LLaMA" OR "DeepSeek"

)

**AND**

(  
"Alzheimer" OR "Alzheimer's disease" OR "Alzheimer disease" OR "mild cognitive impairment" OR "MCI" OR "cognitive decline" OR "cognitive dysfunction" OR "dementia" OR "neurocognitive disorder"

))

Filters: Language- English; Date: 2023/01/01 – Present

**Scopus Total: 587**

## **PubMed Central**

(  
"large language model"[Title/Abstract] OR "large language models"[Title/Abstract] OR  
"ChatGPT"[Title/Abstract] OR "GPT-4"[Title/Abstract] OR "GPT-3.5"[Title/Abstract] OR  
"GPT-4o"[Title/Abstract] OR "generative pre-trained transformer"[Title/Abstract] OR  
"LLaMA"[Title/Abstract] OR "DeepSeek"[Title/Abstract] OR "generative artificial  
intelligence"[Title/Abstract] OR "generative AI"[Title/Abstract]

)

**AND**

(  
"Alzheimer Disease"[MeSH] OR "Cognitive Dysfunction"[MeSH] OR  
"Alzheimer"[Title/Abstract] OR "mild cognitive impairment"[Title/Abstract] OR  
"dementia"[Title/Abstract] OR "cognitive decline"[Title/Abstract] OR "neurocognitive  
disorder"[Title/Abstract]

)

Filters: Date: 2023/01/01 – Present

**PubMed Central Total: 231**

## **Summary**

PubMed: 279 results

Scopus: 587 results

PubMed Central: 231 results

Total records before duplicate removal: 1097

Searches were conducted on 18 April 2026. Results may differ if the queries are re-run on a different date due to ongoing PubMed indexing updates.

**Table S2.** Risk-of-bias summary for all included studies (n = 11), including assessment tool, overall judgment, and primary methodological concern.

| <b>Study</b>    | <b>Tool</b> | <b>Overall RoB</b> | <b>Primary Concern</b>                                                                                                          |
|-----------------|-------------|--------------------|---------------------------------------------------------------------------------------------------------------------------------|
| Hasan 2024      | AXIS        | Low                | Small sample (n=20) but well-designed usability study with validated CUQ instrument and IRB approval.                           |
| Aguirre 2024    | AXIS        | Low                | 60 posts, 3 expert raters (>15 yr experience), consensus scoring, IRB approved.                                                 |
| Tukur Jido 2025 | AXIS        | Some concerns      | Very small item pool (n=3 per condition for AD subset). Automated readability only, no expert evaluation.                       |
| Zhou 2026       | AXIS        | Low                | Mixed methods, 12 experts, validated instruments, prompt engineering documented, IRB approved.                                  |
| Maiti 2025      | AXIS        | Some concerns      | Only 3 questions. Seven evaluators (domain experts in dementia research). Methods insufficient for replication. Workshop paper. |
| Nie 2026        | QUADAS-AI   | High               | Best checkpoint selected on ADNI test set → test-set leakage. ADNI not representative of clinical populations.                  |
| Dosso 2024      | AXIS        | Low                | 18 FAQ items, QUEST validated tool, 2 coders with 83% inter-rater agreement resolved by discussion.                             |
| Chen 2025       | QUADAS-AI   | Some concerns      | Multiple visits of same patient treated as separate images; patient-level split stated but potential leakage ambiguous.         |
| Zhang 2024      | QUADAS-AI   | High               | Ground truth = human-corrected ChatGPT output → reference standard contamination. Authors acknowledge.                          |
| Huang 2024      | AXIS        | High               | 6 of 10 evaluators are co-authors. Methods lack detail for replication. Co-author bias not discussed as limitation.             |
| Xiao 2025       | AXIS        | Low                | 72 questions, 10 evaluators (6 HP + 4 CP), ICC for inter-rater reliability, IRB approved.                                       |

**Table S3.** QUADAS-AI signalling questions and risk-of-bias judgments for diagnostic studies (n = 3).

*Sounderajah V et al. Nat Med 2021;27:1663–5*

| <b>Signalling Question</b>                           | <b>Nie 2026</b> | <b>Chen 2025</b> | <b>Zhang 2024</b> |
|------------------------------------------------------|-----------------|------------------|-------------------|
| <b>1. Patient Selection</b>                          |                 |                  |                   |
| Consecutive or random sample enrolled?               | Low             | Low              | Low               |
| Case-control design avoided?                         | Low             | Low              | Low               |
| Inappropriate exclusions avoided?                    | Low             | Low              | Some concerns     |
| AI: Dataset representative of target population?     | Some concerns   | Some concerns    | Low               |
| → <b>RoB: Patient Selection</b>                      | Low             | Low              | Low               |
| → <b>Applicability: Patient Selection</b>            | Some concerns   | Some concerns    | Low               |
| <b>2. Index Test (LLM)</b>                           |                 |                  |                   |
| Interpreted without knowledge of reference standard? | High            | Low              | Low               |
| AI: Model version and access date reported?          | Low             | Low              | Low               |
| AI: Prompt design or fine-tuning reported?           | Low             | Low              | Low               |
| AI: Reproducibility addressed?                       | Low             | Low              | Some concerns     |
| → <b>RoB: Index Test</b>                             | High            | Low              | Low               |
| → <b>Applicability: Index Test</b>                   | Low             | Low              | Low               |
| <b>3. Reference Standard</b>                         |                 |                  |                   |
| Likely to correctly classify the condition?          | Low             | Low              | Some concerns     |
| Interpreted without knowledge of index test?         | Low             | Low              | High              |
| → <b>RoB: Reference Standard</b>                     | Low             | Low              | High              |
| → <b>Applicability: Reference Standard</b>           | Low             | Low              | Some concerns     |
| <b>4. Flow and Timing</b>                            |                 |                  |                   |
| Appropriate interval between tests?                  | Low             | Low              | Low               |
| All patients received same reference standard?       | Low             | Low              | Low               |
| All patients included in analysis?                   | Low             | Some concerns    | Low               |
| → <b>RoB: Flow and Timing</b>                        | Low             | Some concerns    | Low               |
| <b>OVERALL</b>                                       |                 |                  |                   |
| → <b>OVERALL RISK OF BIAS</b>                        | High            | Some concerns    | High              |

**Table S4.** QUADAS-AI justification notes for diagnostic studies (n = 3).

| <b>Signalling Question</b>     | <b>Nie 2026</b>                                                                                                      | <b>Chen 2025</b>                                                                              | <b>Zhang 2024</b>                                                                               |
|--------------------------------|----------------------------------------------------------------------------------------------------------------------|-----------------------------------------------------------------------------------------------|-------------------------------------------------------------------------------------------------|
| <b>Patient Selection</b>       |                                                                                                                      |                                                                                               |                                                                                                 |
| Consecutive/random sample?     | ADNI: all eligible subjects with MRI+PET+clinical data. OASIS/NACC: entire available cohorts for external test.      | Random stratified sample of 300 per class from ADNI by patient level.                         | Random selection of 765 from 34,465 eligible clinical notes.                                    |
| Case-control avoided?          | Registry-based cohort (AD/MCI/CN from ADNI), not case-control.                                                       | Same, ADNI registry, not case-control.                                                        | Cross-sectional EHR extraction. Not case-control.                                               |
| Inappropriate exclusions?      | No exclusions beyond data completeness requirements.                                                                 | Subjects with missing MRI excluded; otherwise, appropriate.                                   | Required brain MRI → excluded ~50% of patients. Racial composition shifts. Authors acknowledge. |
| AI: Representative dataset?    | ADNI is predominantly white, highly selected research cohort. Not representative of real-world clinical populations. | Same ADNI limitation. OASIS zero-shot provides some external signal but also research cohort. | Real-world EHR from NYU Langone. Diverse academic medical centre. Racial breakdown reported.    |
| <b>Index Test</b>              |                                                                                                                      |                                                                                               |                                                                                                 |
| Blinded to reference standard? | Trained on labels; at inference no labels seen. BUT best checkpoint selected on ADNI test set → test-set leakage.    | At inference, predictions generated without seeing labels. Patient-level split for test set.  | Zero-shot prompting. No access to reference standard at any stage.                              |
| Model version reported?        | LLaVA-1.5-7B, CLIP ViT-L/336px, Vicuna-v1.5. GitHub code link provided.                                              | FLAN-T5, EVA_CLIP, bio-ClinicalBERT,                                                          | GPT-4 API "2023-03-15-preview". LLaMA-2-70b-chat.                                               |

|                                 |                                                                                 |                                                                                                         |                                                                                                                          |
|---------------------------------|---------------------------------------------------------------------------------|---------------------------------------------------------------------------------------------------------|--------------------------------------------------------------------------------------------------------------------------|
|                                 |                                                                                 | ADFormer. GitHub code link provided.                                                                    | Access date: June 9, 2023.                                                                                               |
| Prompt/fine-tuning reported?    | LoRA fine-tuning. Prompt templates in Appendix A. All hyperparameters reported. | ADFormer fusion module. lr=2e-5, batch=8, AdamW, WarmupCosine scheduler.                                | Exact prompt provided in S3 Table. Temperature=0. All API parameters reported.                                           |
| Reproducibility?                | Code publicly available. Single training run; no variance across runs reported. | Code publicly available. Single run; no variance reported.                                              | Single API session. Temperature=0 for determinism. No test-retest reliability.                                           |
| <b>Reference Standard</b>       |                                                                                 |                                                                                                         |                                                                                                                          |
| Correctly classifies condition? | ADNI clinical diagnoses per NIA-AA criteria. Well-validated.                    | ADNI clinical diagnoses + MMSE scores. Established instruments.                                         | MMSE/CDR scores in notes are validated, but extraction ground truth derived from ChatGPT outputs.                        |
| Blinded to index test?          | ADNI clinicians made diagnoses independently of AI model.                       | ADNI diagnoses made independently of AI model.                                                          | <b>HIGH RISK:</b> Reviewers saw ChatGPT outputs first, then corrected. Authors explicitly acknowledge bias toward GPT-4. |
| <b>Flow and Timing</b>          |                                                                                 |                                                                                                         |                                                                                                                          |
| Appropriate interval?           | Same ADNI visit timepoint for all data.                                         | Same ADNI visit timepoint.                                                                              | Extraction from same clinical note - no timing issue.                                                                    |
| Same reference standard?        | All classified by same ADNI diagnostic protocol.                                | All classified by same ADNI protocol.                                                                   | All notes evaluated by same human review protocol.                                                                       |
| All included in analysis?       | All subjects with complete multimodal data included.                            | Multiple visits of same patient treated as separate images → potential patient-level train/test leakage | 765 sampled; 23 failed API extraction (742 remaining); 20 used for tuning (722 assigned to reviewers); 12                |

|  |  |                                     |                                                                                                         |
|--|--|-------------------------------------|---------------------------------------------------------------------------------------------------------|
|  |  | despite stated patient-level split. | excluded for JSON parsing errors (710 in final analysis). All exclusions documented in study flowchart. |
|--|--|-------------------------------------|---------------------------------------------------------------------------------------------------------|



|                                |     |     |               |     |               |     |      |     |
|--------------------------------|-----|-----|---------------|-----|---------------|-----|------|-----|
| 18. Funding/COI declared?      | Yes | Yes | Yes           | Yes | Yes           | Yes | Yes  | Yes |
| 19. Ethical approval obtained? | Yes | Yes | Yes           | Yes | N/A           | N/A | Yes  | Yes |
| 20. Future research addressed? | Yes | Yes | Yes           | Yes | Yes           | Yes | Yes  | Yes |
| <b>Overall</b>                 |     |     |               |     |               |     |      |     |
| <b>OVERALL RISK OF BIAS</b>    | Low | Low | Some concerns | Low | Some concerns | Low | High | Low |

Yes = Low risk | No = Concern | DK = Don't know | N/A = Not applicable

**Table S6.** AXIS justification notes for non-diagnostic studies (n = 8).

| <b>Study</b>                                   | <b>Justification</b>                                                                                                                                                                                                                                                                                                                            |
|------------------------------------------------|-------------------------------------------------------------------------------------------------------------------------------------------------------------------------------------------------------------------------------------------------------------------------------------------------------------------------------------------------|
| <b>Hasan 2024: Overall: Low</b>                | IRB approved (NDSU, IRB0005069). 20 caregivers recruited via AD Advocacy and Support. Validated CUQ instrument. Wilcoxon signed-rank tests for paired comparisons. Prompts, RAG architecture, and knowledge graph documented.                                                                                                                   |
| <b>Aguirre 2024: Overall: Low</b>              | IRB approved. 60 Reddit posts coded by 3 clinicians (>15 yr experience). Consensus scoring, 5-category quality framework (factuality, interpretation, application, synthesis, comprehensiveness). Limitations discussed.                                                                                                                        |
| <b>Tukur Jido 2025: Overall: Some concerns</b> | No human participants (AI-generated text only). AD subset n=3 per LLM, too small for stable estimates. Automated readability metrics only (FRE, FKGL, etc.). No expert content evaluation. Kruskal-Wallis test on 9 total outputs.                                                                                                              |
| <b>Zhou 2026: Overall: Low</b>                 | IRB approved (George Mason University). 12 content experts. 32 scenario pairs (baseline vs prompt-engineered). Validated 9-item literature-based evaluation framework. Mann-Whitney U tests. Prompt engineering strategy fully documented.                                                                                                      |
| <b>Maiti 2025: Overall: Some concerns</b>      | Workshop paper (CEUR-WS). Only 3 clinical questions. Seven domain experts (2 mid-career, 3 established, 2 entry-level researchers). EAN guidelines as reference. Friedman test for overall comparisons. Methods lack sufficient detail for independent replication.                                                                             |
| <b>Dosso 2024: Overall: Low</b>                | 18 FAQ items across 3 North American AD organisations. QUEST validated quality tool. 2 coders with 83% inter-rater agreement, disagreements resolved by discussion. FKGL readability. No inferential statistics (descriptive only). No IRB stated, no human participants involved.                                                              |
| <b>Huang 2024: Overall: High</b>               | IRB approved (Vanderbilt). 10 geriatricians evaluated 16 AD myths via REDCap survey. 6 of 10 evaluators are co-authors, which introduces potential bias. Likert scale descriptive only, no inferential statistics. Prompts not provided. Co-author evaluator overlap not discussed as a limitation (though other limitations are acknowledged). |
| <b>Xiao 2025: Overall: Low</b>                 | IRB approved (Tsinghua University, THU01KS2025035). 72 questions (18 treatment + 54 education). 10 evaluators (6 HP + 4 CP; 3 HP + 2 CP per language). ICC for inter-rater reliability. Kruskal-Wallis, Mann-Whitney U, Friedman tests. Bilingual design (EN/Chinese). All prompts documented.                                                  |
